# Supplementary material
Source: Springer Nature journal article supplement (https://www.springermedizin.de/resource/supplementary/12936_2006_303_MOESM1_ESM.pdf/9547136)

**A**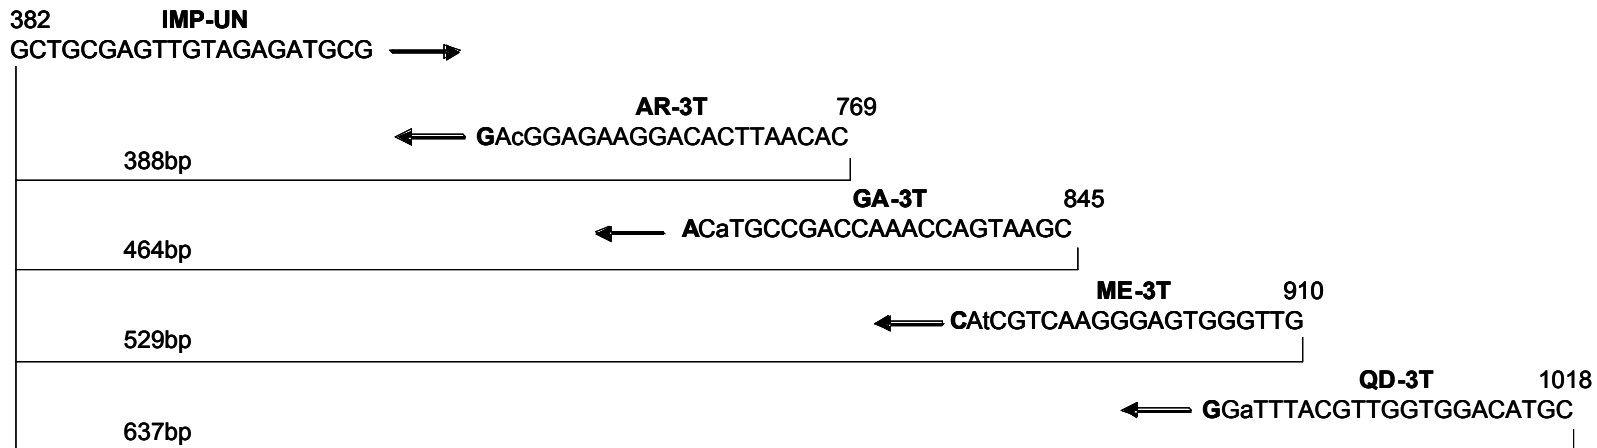**B**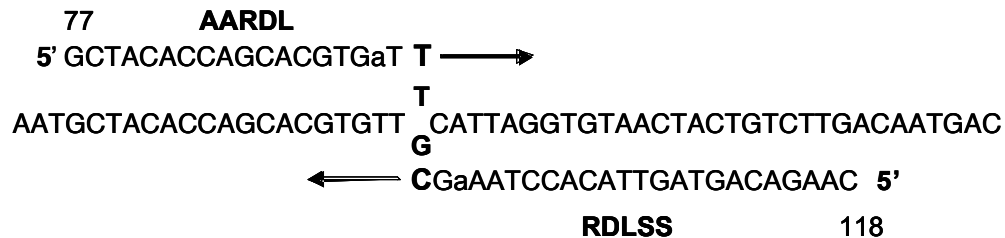

Supplement: MOESM1 [file 9547136]
